# Supplementary material for: Course of illness and outcomes in older COVID-19 patients treated with HFNC: a retrospective analysis
Source: publisher site journal article supplement (doi:10.18632/aging.203224), 2021-06-28
Supplement: Supplementary file [file aging-v13i12-203224-supplementary-material-SD1.pdf]

## SUPPLEMENTARY TABLE

Supplemental Table 1. Multivariate logistic regression analysis of factors related to older COVID-19 patients.

| Variable                           | B     | SE    | Wald  | P-value | Odds rate | 95% CI |       |
|------------------------------------|-------|-------|-------|---------|-----------|--------|-------|
|                                    |       |       |       |         |           | low    | up    |
| HR                                 | 0.016 | 0.28  | 4.863 | 0.027   | 0.941     | 0.891  | 0.993 |
| SpO <sub>2</sub>                   | 0.245 | 0.099 | 4.057 | 0.014   | 1.277     | 1.051  | 1.552 |
| Lactate concentration              | 1.127 | 0.413 | 7.431 | 0.006   | 3.087     | 1.373  | 6.941 |
| PaO <sub>2</sub> /FiO <sub>2</sub> | 1.036 | 0.015 | 5.454 | 0.020   | 2.036     | 2.006  | 2.068 |
| HFNC onset                         |       |       |       |         |           |        |       |
| APTT                               | 0.116 | 0.059 | 3.824 | 0.051   | 1.123     | 1.000  | 1.262 |

non-survival.

B, regression coefficient; SE, Standard Deviation; 95%CI, 95% Confidence interval. SpO<sub>2</sub>= pulse oxygen saturation, FiO<sub>2</sub>=fraction of inspired oxygen, PaO<sub>2</sub>=partial pressure of oxygen, HFNC=high flow nasal cannula, SOFA score = sequential organ failure assessment score. APEACHE II scores = acute physiology and chronic health evaluation II score, APTT=Activated partial thromboplastin time.
